# Supplementary material
Source: Springer Nature journal article supplement (http://www.springermedizin.de/resource/supplementary/12967_2012_1473_MOESM3_ESM.pdf/9574812)

a.

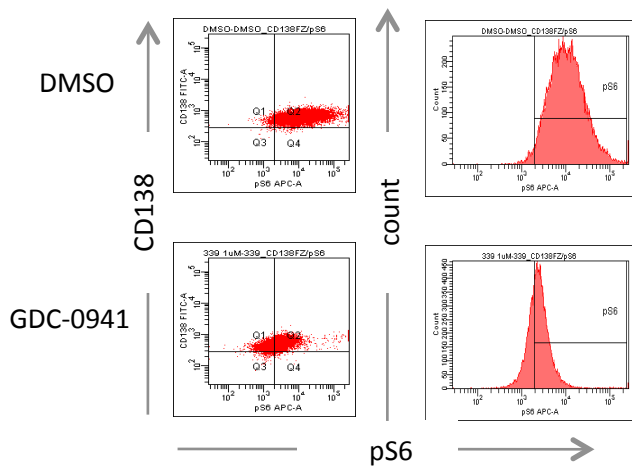

b.

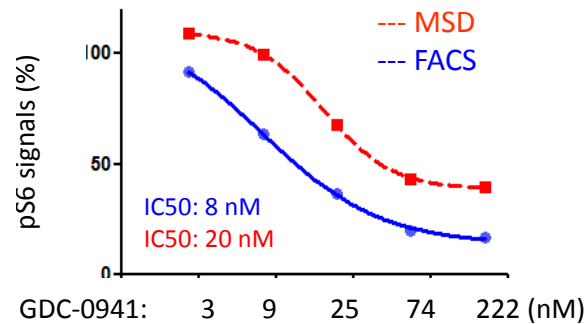

c.

Absolute quantification

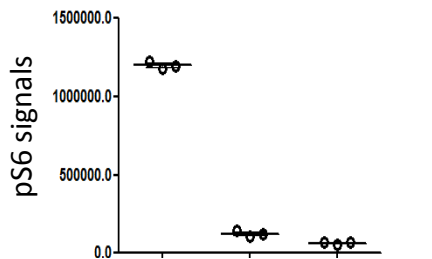

d.

Relative quantification

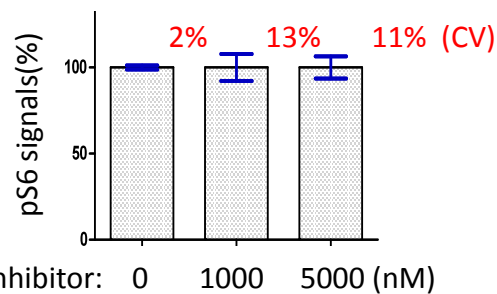

Supplement: MOESM3 [file 9574812]
